1           **Characterization and description of *Faecalibacterium***  
2           ***butyricigenans* sp. nov. and *F. longum* sp. nov., isolated**  
3           **from human faeces**

4  
5   Yuanqiang Zou<sup>1, 2, 3, 4§\*</sup>, Xiaoqian Lin<sup>1, 5§</sup>, Wenbin Xue<sup>1</sup>, Ying Dai<sup>1</sup>, Karsten Kristiansen<sup>1, 2, 4</sup>, Liang  
6   Xiao<sup>1, 3, 4\*</sup>

7  
8   <sup>1</sup> BGI-Shenzhen, Shenzhen 518083, China

9   <sup>2</sup> Laboratory of Genomics and Molecular Biomedicine, Department of Biology, University of  
10   Copenhagen, Universitetsparken 13, 2100 Copenhagen, Denmark

11   <sup>3</sup> Shenzhen Engineering Laboratory of Detection and Intervention of human intestinal microbiome,  
12   BGI-Shenzhen, Shenzhen, China

13   <sup>4</sup> Qingdao-Europe Advanced Institute for Life Sciences, BGI-Shenzhen, Qingdao 266555, China

14   <sup>5</sup> School of Bioscience and Biotechnology, South China University of Technology, Guangzhou  
15   510006, China

16

17   \* **Corresponding authors:**

18   Liang Xiao.

19   Address: BGI-Shenzhen, Beishan Industrial Zone, Shenzhen 518083, China.

20   E-mail: [xiaoliang@genomics.cn](mailto:xiaoliang@genomics.cn)

21   Yuanqiang Zou.

22   Address: BGI-Shenzhen, Beishan Industrial Zone, Shenzhen 518083, China.

23 E-mail: [zouyuanqiang@genomics.cn](mailto:zouyuanqiang@genomics.cn)

24

25 † Yuanqiang Zou and Xiaoqian Lin contributed equally to this work.

26 Running title: *Faecalibacterium butyricigenerans* sp. nov. and *Faecalibacterium longum* sp. nov.

27 Contents Category: New Taxa –*Firmicutes* and related organisms

28

29 **Keywords:** *Faecalibacterium*, *Faecalibacterium butyricigenerans* sp. nov., human faeces,  
30 taxonomy, genome sequencing, phylogenetic analysis, average nucleotide identity

31

## 32 **Abstract**

33 **Exploiting a pure culture strategy to investigate the composition of human gut microbiota,**  
34 **two novel anaerobes, designated strains AF52-21<sup>T</sup> and CM04-06<sup>T</sup>, were isolated from faeces**  
35 **of two healthy Chinese donors and characterized using a polyphasic approach. The two**  
36 **strains were Gram-stain-negative, non-motile, and rod-shaped. Both strains grew optimally**  
37 **at 37°C and pH 7.0. Phylogenetic analysis based on 16S rRNA gene sequences revealed that**  
38 **the two strain clustered with species of the genus *Faecalibacterium* and were most closely**  
39 **related to *Faecalibacterium prausnitzii* ATCC 27768<sup>T</sup> with sequence similarity of 97.18% and**  
40 **96.87%, respectively. The two isolates shared a 16S rRNA gene sequence identity of 98.69%.**  
41 **Draft genome sequencing was performed for strains AF52-21<sup>T</sup> and CM04-06<sup>T</sup>, generating**  
42 **genome sizes of 2.85 Mbp and 3.01 Mbp. The calculated average nucleotide identity values**  
43 **between the genomes of the strains AF52-21<sup>T</sup> and CM04-06<sup>T</sup> compared to *Faecalibacterium***

44 *prausnitzii* ATCC 27768<sup>T</sup> were 83.20% and 82.54%, respectively, and 90.09% when  
45 comparing AF52-21<sup>T</sup> and CM04-06<sup>T</sup>. Both values were below the previously proposed  
46 species threshold (95%), supporting their recognition as novel species in the genus  
47 *Faecalibacterium*. The genomic DNA G+C contents of strain AF52-21<sup>T</sup> and CM04-06<sup>T</sup>  
48 calculated from genome sequences were 57.77 mol% and 57.51 mol%, respectively. Based on  
49 the phenotypic, chemotaxonomic and phylogenetic characteristics, we conclude that both  
50 strains represent two new *Faecalibacterium* species, for which the names *Faecalibacterium*  
51 *butyricigenerans* sp. nov. (type strain AF52-21<sup>T</sup> = CGMCC 1.5206<sup>T</sup> = DSM 103434<sup>T</sup>) and  
52 *Faecalibacterium longum* sp. nov. (type strain CM04-06<sup>T</sup> = CGMCC 1.5208<sup>T</sup> = DSM 103432<sup>T</sup>)  
53 are proposed.

54

## 55 Introduction

56 The human gastrointestinal<sup>1</sup> tract harbours complex microbial communities<sup>2</sup>, dominated by  
57 bacteria from the phyla *Bacteroidetes* and *Firmicutes*<sup>3-6</sup>. The composition and diversity of the gut  
58 microbiota are affected by numerous factors, including host genetics<sup>7</sup>, long-term diet<sup>8,9</sup>, drugs<sup>1,10,11</sup>  
59 and several other environmental factors<sup>12</sup>. Evidence suggests that the composition of the  
60 microbiota is associated with the development of obesity<sup>4,13-15</sup>, diabetes<sup>16,17</sup>, inflammatory bowel  
61 disease<sup>18,19</sup>, colorectal cancer<sup>20,21</sup>, and non-alcoholic fatty liver disease<sup>22,23</sup>. Therefore, the  
62 composition and function of the microbial species living in our gut are crucial importance for  
63 maintenance of health. Short-chain fatty acids (SCFAs), produced by fermentation of dietary fibre  
64 by several abundant genera of the intestinal microbiota, including *Roseburia*, *Eubacterium* and  
65 *Faecalibacterium*<sup>24</sup>, have been reported to elicit beneficial effects on energy metabolism and for

66 prevention of colonization of pathogens<sup>25</sup>. The genus *Faecalibacterium* as an abundant butyric  
67 acid-producing bacterium colonizing the human gut displays anti-inflammatory effects and may be  
68 used as a potential probiotics for treatment of gut inflammation<sup>26,27</sup>.  
69 The genus *Faecalibacterium*, belonging to the family *Ruminococcaceae* within the order  
70 *Clostridiales*, comprises only one validated species, *Faecalibacterium prausnitzii*<sup>28</sup>, and two  
71 non-validly published species, *Faecalibacterium moorei*<sup>29</sup> and *Faecalibacterium hominis*<sup>30</sup>, all  
72 originally isolated from human faeces. *F. prausnitzii* is a gram-negative non-spore-forming and  
73 strictly anaerobic rod-shaped bacterium. The genomic G+C content of genus *Faecalibacterium*  
74 ranges from 47% to 57%<sup>31</sup>. The fermentation products from glucose are butyrate, D-lactate and  
75 formate. In the present study, we describe two novel species of the genus *Faecalibacterium* by  
76 using polyphasic taxonomy along with whole genome sequence analysis.

77

## 78 **Results and discussion**

### 79 **Phenotypic and Chemotaxonomic Characterization**

80 Both strains (AF52-21<sup>T</sup> and CM04-06<sup>T</sup>) were obligate anaerobic, Gram-stain-negative,  
81 non-spore-forming, non-motile and rod-shaped bacteria (**Fig. 1**). After incubation on MPYG agar  
82 at 37°C for 2 days, the colonies appeared 1.0-2.0 mm in diameter, round, creamy white to  
83 yellowish, convex and opaque with entire margins for AF52-21<sup>T</sup> and 2.0 mm in diameter, round,  
84 yellowish, slightly convex and opaque with entire margins for CM04-06<sup>T</sup>. The growth temperature  
85 was 20-42°C (optimum 37°C) for AF52-21<sup>T</sup> and 30-45°C (optimum 37°C) for CM04-06<sup>T</sup>. Growth  
86 was observed at pH 6.0-7.5 (optimum 7.0-7.5) for AF52-21<sup>T</sup> and pH 5.0-8.0 (optimum 7.0-7.5) for  
87 CM04-06<sup>T</sup>. Strains AF52-21<sup>T</sup> and CM04-06<sup>T</sup> grew with 0-1% and 0-3% NaCl, respectively. Both

88 strains were catalase-negative. The major metabolic end products for strains AF52-21<sup>T</sup> and  
 89 CM04-06<sup>T</sup> were acetic acid, formic acid, butyric acid and lactic acid. Differential physiological  
 90 and biochemical characteristics of strains AF52-21<sup>T</sup> and CM04-06<sup>T</sup> with the closest related species  
 91 of genus *Faecalibacterium* are listed in the species description and in **Table 1**.

92

93 **Table 1. Differential phenotypic characteristics of strains AF52-21<sup>T</sup>, CM04-06<sup>T</sup>, and the**  
 94 **related species *F. prausnitzii* ATCC 27768<sup>T</sup>.**

95 Strains: 1, *F. butyricigenerans* AF52-21<sup>T</sup>; 2, *F. longum* CM04-06<sup>T</sup>; 3, *F. prausnitzii* ATCC  
 96 27768<sup>T</sup>. +, positive; w, weakly positive; –, negative.

| Phenotypic features                | 1          | 2          | 3          |
|------------------------------------|------------|------------|------------|
| Growth:                            |            |            |            |
| Temperature range (optimum) (°C)   | 20-42 (37) | 30-45 (37) | 20-42 (37) |
| pH range                           | 6.0-7.5    | 5.0-8.0    | 6.0-7.5    |
| Salt tolerance (%)                 | 1          | 3          | 3          |
| Hydrolysis of:                     |            |            |            |
| Aesculin                           | +          | –          | +          |
| Gelatin                            | –          | +          | –          |
| Acid from (API 20A and API 50CHL): |            |            |            |
| Cellobiose                         | +          | –          | w          |
| D-Fructose                         | w          | –          | +          |
| D-Fucose                           | w          | –          | w          |
| D-Galactose                        | w          | –          | –          |
| D-Glucose                          | w          | –          | +          |
| D-Lactose                          | +          | –          | –          |
| D-Maltose                          | +          | +          | w          |
| D-Fannitol                         | +          | –          | –          |
| D-Fannose                          | w          | –          | –          |
| D-Mannose                          | +          | +          | –          |
| D-Raffinose                        | –          | w          | –          |
| D-Trehalose                        | +          | w          | w          |
| Gluconate                          | –          | –          | +          |
| Glycogen                           | +          | –          | –          |

|                                            |       |       |       |
|--------------------------------------------|-------|-------|-------|
| Inositol                                   | w     | –     | –     |
| Inulin                                     | +     | –     | +     |
| Methyl- $\beta$ -D-Xylopyranoside          | w     | –     | –     |
| Enzyme activity (API ZYM):                 |       |       |       |
| <i>N</i> -acetyl- $\beta$ -Glucosaminidase | –     | w     | –     |
| Naphthol-AS-BI-Phosphohydrolase            | +     | –     | +     |
| $\alpha$ -Glucosidase                      | –     | –     | +     |
| $\beta$ -Galactosidase                     | –     | –     | w     |
| $\beta$ -Glucosidase                       | +     | –     | –     |
| $\beta$ -Glucuronidase                     | +     | w     | +     |
| DNA G+C (mol %)                            | 57.77 | 57.51 | 52–57 |

97 All data are from this study.

98

99 The result of cellular fatty acid profiles of strain AF52-21<sup>T</sup>, CM04-06<sup>T</sup> and related species are  
100 shown in **Table 2**. The major components of fatty acids (constituting >5% of the total) present in  
101 strain AF52-21<sup>T</sup> were C<sub>14:0</sub> (5.9%), C<sub>16:0</sub> (16.3%), C<sub>18:1</sub>  $\omega$ 7 $c$  (8.1), C<sub>18:1</sub>  $\omega$ 9 $c$  (39.0%) and iso-C<sub>19:0</sub>  
102 (12.9%). The profiles including C<sub>16:0</sub> (25.5%), C<sub>18:1</sub>  $\omega$ 7 $c$  (7.5%), C<sub>18:1</sub>  $\omega$ 9 $c$  (32.5%), iso-C<sub>19:0</sub> (5.9%)  
103 and iso-C<sub>17:1</sub> I/anteiso B (9.7%) were detected as the predominant fatty acids for strain CM04-06<sup>T</sup>.  
104 The highest levels of fatty acids, including C<sub>16:0</sub> and C<sub>18:1</sub>  $\omega$ 9 $c$ , were similar, but not identical  
105 comparing strain AF52-21<sup>T</sup>, CM04-06<sup>T</sup> and ATCC 27768<sup>T</sup>. Furthermore, strains AF52-21<sup>T</sup>,  
106 CM04-06<sup>T</sup> and ATCC 27768<sup>T</sup> could be differentiated by less abundant fatty acids, such as C<sub>18:1</sub>  
107 2OH, anteiso-C<sub>15:0</sub>, anteiso-C<sub>17:0</sub>, C<sub>13:0</sub> 3OH/Iso-C<sub>15:1</sub> I, C<sub>16:1</sub>  $\omega$ 7 $c$ /C<sub>16:1</sub>  $\omega$ 6 $c$  and anteiso-C<sub>18:0</sub>/C<sub>18:2</sub>  
108  $\omega$ 6, 9 $c$  (**Table 2**).

109

110 **Table 2. Fatty acid profile of strains AF52-21<sup>T</sup>, CM04-06<sup>T</sup> and the closest related species *F.***  
111 ***prausnitzii* ATCC 27768<sup>T</sup>.**

112 Numbers represent percentages of the total fatty acids. –, not detected (<1%).

| Fatty acids composition                           | <i>F. butyricigenans</i><br>AF52-21 <sup>T</sup> | <i>F. longum</i><br>CM04-06 <sup>T</sup> | <i>F. prausnitzii</i><br>ATCC 27768 <sup>T</sup> |
|---------------------------------------------------|--------------------------------------------------|------------------------------------------|--------------------------------------------------|
| C <sub>12:0</sub>                                 | 1.5                                              | 1.8                                      | 1.9                                              |
| C <sub>13:1</sub>                                 | –                                                | –                                        | 1.25                                             |
| C <sub>14:0</sub>                                 | <b>5.9</b>                                       | 4.6                                      | <b>11.8</b>                                      |
| C <sub>16:0</sub>                                 | <b>16.3</b>                                      | <b>25.5</b>                              | <b>21.1</b>                                      |
| C <sub>17:1 ω8c</sub>                             | 1.3                                              | –                                        | 1.1                                              |
| C <sub>18:1 ω7c</sub>                             | <b>8.1</b>                                       | <b>7.5</b>                               | <b>5.7</b>                                       |
| C <sub>18:1 ω9c</sub>                             | <b>39.0</b>                                      | <b>32.5</b>                              | <b>31.4</b>                                      |
| C <sub>18:0</sub>                                 | 4.5                                              | 3.5                                      | 4.1                                              |
| C <sub>18:1 2OH</sub>                             | 2.9                                              | –                                        | 2.0                                              |
| Iso-C <sub>19:1 I</sub>                           | 1.2                                              | 1.1                                      | 2.1                                              |
| Iso-C <sub>19:0</sub>                             | <b>12.9</b>                                      | <b>5.9</b>                               | –                                                |
| Anteiso-C <sub>15:0</sub>                         | –                                                | 2.6                                      | –                                                |
| Anteiso-C <sub>17:0</sub>                         | –                                                | 2.1                                      | –                                                |
| C <sub>13:0 3OH</sub> / Iso-C <sub>15:1 I</sub>   | –                                                | –                                        | 2.1                                              |
| C <sub>16:1 ω7c</sub> / C <sub>16:1 ω6c</sub>     | 1.5                                              | 1.9                                      | 4.0                                              |
| Iso-C <sub>17:1 I</sub> /anteiso B                | 4.7                                              | <b>9.7</b>                               | <b>7.6</b>                                       |
| Antei-C <sub>18:0</sub> /C <sub>18:2 ω6, 9c</sub> | –                                                | 1.9                                      | 1.3                                              |

113

## 114 Phylogenetic Analysis

115 The almost complete 16S rRNA gene sequences of strains AF52-21<sup>T</sup> and CM04-06<sup>T</sup>, comprising

116 1,382bp and 1,374bp, respectively, were obtained. BLAST analysis of the 16S rRNA gene

117 sequences against the EzBioCloud server showed that the two strains grouped in the genus

118 *Faecalibacterium* within the family *Ruminococcaceae* and were most closely related to *F.*

119 *prausnitzii* ATCC 27768<sup>T</sup>, which is the sole valid species of the genus *Faecalibacterium*, with

120 similarity values of 97.18% and 96.87%, respectively. *Faecalibacterium hominis* 4P-15<sup>T</sup>, an

121 unrecognized species of the genus *Faecalibacterium*, was also used as a related taxa for 16S rRNA

122 gene analysis. Strains AF52-21<sup>T</sup> and CM04-06<sup>T</sup> share 16S rRNA gene sequence similarity of

123 98.65% and 97.68% with *F. hominis* 4P-15<sup>T</sup>. The 16S rRNA gene sequence similarity between

124 strains AF52-21<sup>T</sup> and CM04-06<sup>T</sup> was 98.69% (**Table 3**), both these values were lower than the  
125 recommended thresholds (98.7%) for classification of human-associated bacterial isolates at the  
126 species level<sup>32</sup>. Phylogenetic analysis based on the neighbour-joining, maximum-likelihood and  
127 minimum-evolution (**Fig. 2, Supplementary Fig. S1 and Fig. S2**, respectively) confirmed the  
128 result of affiliation of the novel isolates with the species of the genus *Faecalibacterium* and  
129 revealed that the two isolates formed a distinct lineage with *F. prausnitzii* ATCC 27768<sup>T</sup>.

130

131 **Table 3. Levels of 16S rRNA gene sequence similarity and ANI values (in percentages) based**  
132 **on BLAST for strains AF52-21<sup>T</sup>, CM04-06<sup>T</sup> and the phylogenetically related species *F.***  
133 ***prausnitzii* ATCC 27768<sup>T</sup> and the unrecognized species *Faecalibacterium hominis* 4P-15<sup>T</sup>.**

134 Taxa: 1, *F. butyricigenens* AF52-21<sup>T</sup>; 2, *F. longum* CM04-06<sup>T</sup>; 3, *F. prausnitzii* ATCC  
135 27768<sup>T</sup>; 4, *Faecalibacterium hominis* 4P-15<sup>T</sup>.

| Strain                                       | Accession no. | 1     | 2     | 3       | 4       |
|----------------------------------------------|---------------|-------|-------|---------|---------|
| <b>16S rRNA gene sequence similarity (%)</b> |               |       |       |         |         |
| AF52-21 <sup>T</sup>                         | KX146426      | 100   | 98.69 | 97.18   | 98.65   |
| CM04-06 <sup>T</sup>                         | KX150462      | 98.69 | 100   | 96.87   | 97.68   |
| ATCC 27768 <sup>T</sup>                      | AJ413954      | 97.18 | 96.87 | 100     | 98.35   |
| 4P-15 <sup>T</sup>                           | NMDCN000012L  | 98.65 | 97.68 | 98.35   | 100     |
| <b>ANI values (%)</b>                        |               |       |       |         |         |
| AF52-21 <sup>T</sup>                         | CNA0017730    | 100   | 90.01 | 83.16   | 85.72   |
| CM04-06 <sup>T</sup>                         | CNA0017731    | 90.19 | 100   | 82.53   | 85.40   |
| ATCC 27768 <sup>T</sup>                      | CNA0017732    | 83.32 | 82.58 | 100     | 85.7985 |
| 4P-15 <sup>T</sup>                           | NMDC60014083  | 85.72 | 85.40 | 85.7985 | 100     |

136



137 **Genome Analysis and function annotation**

138 The assembled draft genomes of strains AF52-21<sup>T</sup> and CM04-06<sup>T</sup> comprised total lengths of  
139 2,851,918bp and 3,011,178bp with 73 and 47 scaffolds, respectively (**Table 4**). The G+C contents  
140 calculated from genome sequences were 57.77% and 57.51%, which were slightly higher than the  
141 range reported previously for the genus *Faecalibacterium* (47-57 mol%)<sup>28</sup>. CheckM analysis of  
142 the genomes showed high completeness (>90%) and low contamination (<5%) (**Table 4**),  
143 indicating these are high-quality genomes sequences. The genome comparison between strains  
144 AF52-21<sup>T</sup>, CM04-06<sup>T</sup>, ATCC 27768<sup>T</sup> and 4P-15<sup>T</sup> showed ANI values ranged from 82.53% to  
145 90.19% (**Table 3**), which were significantly below the proposed cutoff value of 95–96% for  
146 delineating bacterial species, indicating that strains AF52-21<sup>T</sup> and CM04-06<sup>T</sup> represented novel  
147 species in the genus *Faecalibacterium*. Circular maps of the two strains AF52-21<sup>T</sup> and CM04-06<sup>T</sup>  
148 are shown in **Fig. 3** and **Fig. 4**.

149

150 **Table 4. Genome properties of *F. butyricigenerans* AF52-21<sup>T</sup> and *F. longum* CM04-06<sup>T</sup>.**

| <b>Feature</b>               | <b>AF52-21<sup>T</sup></b> | <b>CM04-06<sup>T</sup></b> |
|------------------------------|----------------------------|----------------------------|
| Accession No.                | CNA0017730                 | CNA0017731                 |
| Approximate Genome Size (bp) | 2,851,918                  | 3,011,178                  |
| G+C content (mol%)           | 57.77                      | 57.51                      |
| DNA scaffolds                | 73                         | 47                         |
| N50 Length                   | 191,233                    | 119,299                    |
| Completeness                 | 100                        | 99.32                      |
| Contamination                | 0                          | 0                          |
| Genes total number           | 2,291                      | 2,506                      |
| Gene average length (bp)     | 939                        | 920                        |
| rRNAs (5S, 16S, 23S)         | 4                          | 5                          |

---

|                        |      |      |
|------------------------|------|------|
| tRNAs                  | 60   | 61   |
| sRNA                   | 0    | 0    |
| Genes assigned to COGs | 2029 | 2164 |

---

151

152 For genome annotation, the distributions of the genes into clusters of orthologous groups (COGs)  
153 functional categories are depicted in **Fig. 5** and **Table S1**. Both strain strains AF52-21<sup>T</sup> and  
154 CM04-06<sup>T</sup> share identical COGs functional categories. The abundant categories comprise amino  
155 acid transport and metabolism (E), carbohydrate transport and metabolism (G), cell  
156 wall/membrane/envelope biogenesis (M), energy production and conversion (C), general function  
157 prediction only (R), replication, recombination and repair (L), signal transduction mechanisms (T),  
158 transcription (K) and translation, ribosomal structure and biogenesis (J). Annotated genes  
159 associated with synthesis of diaminopimelic acid, teichoic and lipoteichoic acids and  
160 lipopolysaccharides, and metabolism of polar lipids and polyamines by RAST annotation,  
161 comparing strains AF52-21<sup>T</sup>, CM04-06<sup>T</sup> with ATCC 27768<sup>T</sup>, are shown in **Table 5** and **Table S2**.

162

163 **Table 5. Number of genes associated with biosynthetic pathway from whole genome**  
164 **sequences of strain *F. butyricigenans* AF52-21<sup>T</sup> and *F. longum* CM04-06<sup>T</sup> and *F. prausnitzii***  
165 **ATCC 27768<sup>T</sup> identified by RAST.**

166 Taxa: 1, AF52-21<sup>T</sup>; 2, CM04-06<sup>T</sup>; 3, *F. prausnitzii* ATCC 27768<sup>T</sup>. Data are for type strains.

167 Numbers of genes identified for lipopolysaccharides and mycolic acids were zero for all taxa  
168 studied.

---

|                                           |          |          |          |
|-------------------------------------------|----------|----------|----------|
| <b>Genes responsible for biosynthesis</b> | <b>1</b> | <b>2</b> | <b>3</b> |
|-------------------------------------------|----------|----------|----------|

---

---

|                                 |    |    |    |
|---------------------------------|----|----|----|
| Diaminopimelic acid             | 11 | 12 | 12 |
| Polar lipids                    | 18 | 19 | 22 |
| Polyamines                      | 12 | 13 | 11 |
| Quinones                        | 14 | 16 | 15 |
| Teichoic and lipoteichoic acids | 3  | 2  | 3  |

---

169

170 The annotation showed that AF52-21<sup>T</sup>, CM04-06<sup>T</sup>, and ATCC 27768<sup>T</sup> contained a complete  
171 acetyl-CoA to butyrate synthesis pathway, but possessed butyryl-CoA:acetate CoA-transferase  
172 activity only in the final step (**Fig. 6**), as discussed previously<sup>33,34</sup>. Prophages were identified  
173 using the PHAST software, and the results are shown in **Fig. 7**. Two incomplete phage sequences  
174 were detected in the AF52-21<sup>T</sup> genome, one of which encodes the Phd\_YefM protein, an antitoxin  
175 component. Three incomplete phage sequences and two intact prophages were detected in the  
176 CM04-06<sup>T</sup> genome, encoding the Phd\_YefM protein, relaxase/mobilisation nuclease domain,  
177 bacterial mobilisation protein (MobC) /ribbon-helix-helix protein, helix-turn-helix, and predicted  
178 transcriptional regulators. Moreover, the antibiotic resistance analysis indicated that AF52-21<sup>T</sup>  
179 contained macrolide antibiotic, lincosamide antibiotic, and streptogramin antibiotic genes, while  
180 CM04-06<sup>T</sup> and ATCC 27768<sup>T</sup> contained aminoglycoside antibiotic genes (**Fig. 8**).

181

## 182 Discussion

183 The 16S rRNA genes phylogenetic, physiological results and genome description showed that the  
184 two new isolates AF52-21<sup>T</sup> and CM04-06<sup>T</sup> represent two novel species. The ANI values between  
185 AF52-21<sup>T</sup>, CM04-06<sup>T</sup> and the closest related species ATCC 27768<sup>T</sup> were 82.54% and 90.09%,  
186 respectively, which is in support of a new species delineation. The result of biochemical and

187 genomic functional analyses showed that both AF52-21<sup>T</sup> and CM04-06<sup>T</sup> are butyric  
188 acid-producing bacteria.

189 Most strains in the genus *Faecalibacterium* exhibit a common ability to produce butyric acid,  
190 peptides and other anti-inflammatory substances, which have immunomodulatory effects<sup>26,27,35</sup>.

191 Some studies have confirmed that the decreased abundance of this genus is related to the  
192 occurrence and development of inflammatory bowel diseases<sup>36-38</sup>. Accordingly, *Faecalibacterium*  
193 is receiving much attention as one of the candidate next-generation probiotics (NGPs) , which can  
194 be used for disease treatment<sup>39,40</sup>.

195 Previous studies based on comparative genomics from isolates suggested the wide diversity of this  
196 genus, with the presence of at least two phylotypes in *F. prausnitzii*<sup>29</sup>. A recent study analysing the  
197 *Faecalibacterium*-like MAGs, proposed that *Faecalibacterium* from the human gut can be divided  
198 into 12 clades<sup>40</sup>. These studies have expanded the diversity of *Faecalibacterium* and proposed that  
199 different phylotypes have different functions, which results in different contributions to health or  
200 diseases.

201 Moreover, as a candidate taxa for the NGPs, the *Faecalibacterium* isolates can be used for in-vitro  
202 functional verification and animal model experiments to further explore its probiotic functions,  
203 and ultimately expected to be used in clinical disease intervention.

204

## 205 **Description of *Faecalibacterium butyricigenerans* sp. nov.**

206 *Faecalibacterium butyricigenerans* (bu.ty.ri.ci.ge'ne.rans. N.L. n. *acidum butyricum* butyric  
207 acid; L. part. adj. *generans*, producing; N.L. adj. *butyricigenerans*, butyric acid-producing;  
208 referring to its production of butyric acid)

209 Cells of strain AF52-21<sup>T</sup> are Gram-stain-negative, non-motile, non-spore-forming and rod-  
210 shaped. Strictly anaerobic and catalase negative. Colonies on PYG agar are round, creamy white  
211 to yellowish, convex and opaque with entire margins and colony size is approximately 1.0-2.0 mm  
212 in diameter after incubation at 37°C for 2 days. Cells are able to grow at 20-42°C with optimum  
213 temperature at 37°C. The pH range for growth is 6.0-7.5 (optimum at 7.0-7.5). Growth occurs at  
214 NaCl concentrations 0-1%. The strain is positive for the assimilation of cellobiose, D-lactose,  
215 D-maltose, D-mannitol, D-mannose, D-trehalose, glycogen, inulin, D-fructose, D-fucose,  
216 D-galactose, D-glucose, inositol and methyl- $\beta$ -D-xylopyranoside, but negative for amygdalin,  
217 arbutin, D-adonitol, D-arabinose, D-arabitol, D-lyxose, D-melezitose, D-melibiose, D-raffinose,  
218 D-ribose, D-sorbitol, D-tagatose, D-turanose, dulcitol, D-xylose, erythritol, gentiobiose, gluconate,  
219 glycerol, L-arabinose, L-arabitol, L-fucose, L-rhamnose, L-sorbose, L-xylose,  
220 methyl-D-glucopyranoside, methyl- $\alpha$ -D-mannopyranoside, *N*-acetyl-glucosamine, salicin, starch,  
221 sucrose, xylitol, 2-ketogluconate and 5-ketogluconate. In enzymatic activity tests, strain AF52-21<sup>T</sup>  
222 is positive for naphthol-AS-BI-phosphohydrolase,  $\beta$ -glucuronidase and  $\beta$ -glucosidase, and  
223 negative for alkaline phosphatase, esterase (C4), esterase lipase (C8), lipase (C14), leucine  
224 arylamidase, valine arylamidase, cystine arylamidase, trypsin,  $\alpha$ -chymotrypsin, acid phosphatase,  
225 naphthol-AS-BI-phosphohydrolase,  $\alpha$ -galactosidase,  $\beta$ -galactosidase,  $\alpha$ -glucosidase,  
226  $\alpha$ -mannosidase and  $\beta$ -fucosidase. Indole is not produced. Positive for hydrolysis of esculin and  
227 negative for gelatin. Formic acid, acetic acid, butyric acid and lactic acid are the fermentation  
228 products. The major fatty acids are C<sub>14:0</sub>, C<sub>16:0</sub>, C<sub>18:1</sub>  $\omega$ 7c, C<sub>18:1</sub>  $\omega$ 9c and iso-C<sub>19:0</sub>.

229 In the result of RAST annotation, 11 genes/proteins are associated with biosynthesis of DAP,  
230 including 4-hydroxy-tetrahydrodipicolinate reductase (EC 1.17.1.8),

231 4-hydroxy-tetrahydrodipicolinate synthase (EC 4.3.3.7), aspartate-semialdehyde dehydrogenase  
232 (EC 1.2.1.11), aspartokinase (EC 2.7.2.4) (2 copies), diaminopimelate decarboxylase (EC  
233 4.1.1.20), diaminopimelate epimerase (EC 5.1.1.7), L, L-diaminopimelate aminotransferase (EC  
234 2.6.1.83), *N*-acetyl-L, L-diaminopimelate deacetylase (EC 3.5.1.47),  
235 UDP-*N*-acetylmuramoylalanyl-D-glutamate-2, 6-diaminopimelate ligase (EC 6.3.2.13) and  
236 UDP-*N*-acetylmuramoylalanyl-D-glutamyl-2, 6-diaminopimelate-D-alanyl-D-alanine ligase (EC  
237 6.3.2.10). 18 genes/proteins are associated with biosynthesis of polar lipids, including  
238 1-acyl-sn-glycerol-3-phosphate acyltransferase (EC 2.3.1.51) (2 copies), ABC-type  
239 multidrug/protein/lipid transport system, ATPase component, acyl carrier protein (3 copies),  
240 acyl-phosphate:glycerol-3-phosphate O-acyltransferase PlsY, cardiolipin synthetase (EC 2.7.8.-) (3  
241 copies), CDP-diacylglycerol--glycerol-3-phosphate 3-phosphatidyltransferase (EC 2.7.8.5),  
242 dihydroxyacetone kinase family protein, glycerol kinase (EC 2.7.1.30), glycerol-3-phosphate  
243 dehydrogenase [NAD(P)<sup>+</sup>] (EC 1.1.1.94), phosphate:acyl-ACP acyltransferase PlsX,  
244 phosphatidate cytidyltransferase (EC 2.7.7.41) and phosphatidylglycerophosphatase B (EC  
245 3.1.3.27) (2 copies). 12 genes/proteins are associated with biosynthesis of polyamines, including  
246 5'-methylthioadenosine nucleosidase (EC 3.2.2.16), S-adenosylhomocysteine nucleosidase (EC  
247 3.2.2.9), ABC transporter, periplasmic spermidine putrescine-binding protein PotD (TC  
248 3.A.1.11.1), agmatinase (EC 3.5.3.11), arginine decarboxylase (EC 4.1.1.19), arginine/ornithine  
249 antiporter ArcD (2 copies), carboxynorspermidine decarboxylase, putative (EC 4.1.1.-),  
250 carboxynorspermidine dehydrogenase, putative (EC 1.1.1.-), putrescine transport ATP-binding  
251 protein PotA (TC 3.A.1.11.1), spermidine putrescine ABC transporter permease component PotB  
252 (TC 3.A.1.11.1), spermidine putrescine ABC transporter permease component potC

253 (TC..3.A.1.11.1) and spermidine synthase (EC 2.5.1.16). 3 genes/proteins are associated with  
254 biosynthesis of teichoic and lipoteichoic acids, including cell wall teichoic acid glycosylation  
255 protein gtcA, teichoic acid export ATP-binding protein TagH (EC 3.6.3.40) and membrane protein  
256 involved in the export of O-antigen, teichoic acid lipoteichoic acids. 14 genes/proteins are  
257 associated with biosynthesis of quinones, including 2-heptaprenyl-1,4-naphthoquinone  
258 methyltransferase (EC 2.1.1.163), electron transport complex protein RnfA (2 copies), electron  
259 transport complex protein RnfB, electron transport complex protein RnfC, electron transport  
260 complex protein RnfD (2 copies), electron transport complex protein RnfE (2 copies), electron  
261 transport complex protein RnfG, F420H2:quinone oxidoreductase, heptaprenyl diphosphate  
262 synthase component I (EC 2.5.1.30), microsomal dipeptidase (EC 3.4.13.19) and undecaprenyl  
263 diphosphate synthase (EC 2.5.1.31). There are no genes responsible for biosynthesis of  
264 lipopolysaccharides or mycolic acids. Additional annotations showed that the AF52-21<sup>T</sup> genome  
265 contains a complete butyrate synthesis pathway, two prophage remnants, and three antibiotic  
266 genes.

267 The type strain, AF52-21<sup>T</sup> (=CGMCC 1.5206<sup>T</sup> = DSM 103434<sup>T</sup>), was isolated from human  
268 gut. The G+C content of the genomic DNA is 57.77 mol% as calculated from whole genome  
269 sequencing.

270

## 271 **Description of *Faecalibacterium longum* sp. nov.**

272 *Faecalibacterium longum* (lon'gum. L. neut. adj. *longum* long, the shape of the cells)

273 Cells are Gram-stain-negative, non-motile, non-spore forming, long rod in shape. Strictly  
274 anaerobic. Catalase and urease are negative. Colonies are round, yellowish, slightly convex,

275 opaque with entire margins with 2.0 mm in diameter on PYG agar for incubation at 37°C for 48 h  
276 under anaerobic condition. The strain showed growth at 30-45°C (optimum temperature is 37°C).  
277 Growth is observed at pH 5.0-8.0 (optimum pH is 7.0-7.5 ). NaCl is tolerated with concentrations  
278 up to 3%. Acid is produced from D-maltose, D-mannose, D-raffinose, D-trehalose and salicin, but  
279 not from amygdalin, arbutin, cellobiose, D-adonitol, D-arabinose, D-arabitol, D-cellobiose,  
280 D-fructose, D-fucose, D-galactose, D-glucose, D-lactose, D-lyxose, D-maltose, D-mannitol,  
281 D-mannose, D-melezitose, D-melibiose, D-raffinose, D-ribose, D-sorbitol, D-sucrose, D-tagatose,  
282 D-turanose, dulcitol, D-xylose, erythritol, gentiobiose, gluconate, glycerol, glycogen, inositol,  
283 inulin, L-arabinose, L-arabitol, L-fucose, L-rhamnose, L-sorbose, L-xylose,  
284 methyl-D-glucopyranoside, methyl- $\alpha$ -D-mannopyranoside, methyl- $\beta$ -D-xylopyranoside,  
285 *N*-acetyl-glucosamine, salicin, starch, sucrose, xylitol, 2-ketogluconate and 5-ketogluconate. In the  
286 API ZYM strip, strain showed weakly positive enzyme activities for  $\beta$ -glucuronidase and  
287 *N*-acetyl- $\beta$ -glucosaminidase, but negative for alkaline phosphatase, esterase (C4), esterase lipase  
288 (C8), lipase (C14), leucine arylamidase, valine arylamidase, cystine arylamidase, trypsin,  
289  $\alpha$ -chymotrypsin, acid phosphatase, naphthol-AS-BI-phosphohydrolase,  $\alpha$ -galactosidase,  
290  $\beta$ -galactosidase,  $\alpha$ -glucosidase,  $\beta$ -glucosidase,  $\alpha$ -mannosidase and  $\beta$ -fucosidase. Indole is not  
291 produced. Gelatin is hydrolysed, but aesculin is not. Major end products are acetic acid, formic  
292 acid, butyric acid and lactic acid. The major fatty acids (constituting >5% of the total) are C<sub>16:0</sub>,  
293 C<sub>18:1</sub>  $\omega$ 7c, C<sub>18:1</sub>  $\omega$ 9c, iso-C<sub>19:0</sub> and iso-C<sub>17:1</sub> I/anteiso B.

294 In the result of RAST annotation, 12 genes/proteins are associated with biosynthesis of DAP,  
295 including 4-hydroxy-tetrahydrodipicolinate reductase (EC 1.17.1.8),  
296 4-hydroxy-tetrahydrodipicolinate synthase (EC 4.3.3.7) (2 copies), aspartate-semialdehyde



297 dehydrogenase (EC 1.2.1.11), aspartokinase (EC 2.7.2.4) (2 copies), diaminopimelate  
298 decarboxylase (EC 4.1.1.20), diaminopimelate epimerase (EC 5.1.1.7), L, L-diaminopimelate  
299 aminotransferase (EC 2.6.1.83), *N*-acetyl-L, L-diaminopimelate deacetylase (EC 3.5.1.47),  
300 UDP-*N*-acetylmuramoylalanyl-D-glutamate-2, 6-diaminopimelate ligase (EC 6.3.2.13) and  
301 UDP-*N*-acetylmuramoylalanyl-D-glutamyl-2, 6-diaminopimelate-D-alanyl-D-alanine ligase (EC  
302 6.3.2.10). 19 genes/proteins are associated with biosynthesis of polar lipids, including  
303 1-acyl-sn-glycerol-3-phosphate acyltransferase (EC 2.3.1.51) (2 copies), ABC-type  
304 multidrug/protein/lipid transport system, ATPase component, acyl carrier protein (3 copies),  
305 acyl-phosphate:glycerol-3-phosphate O-acyltransferase PlsY, cardiolipin synthetase (EC 2.7.8.-) (2  
306 copies), CDP-diacylglycerol--glycerol-3-phosphate 3-phosphatidyltransferase (EC 2.7.8.5),  
307 dihydroxyacetone kinase family protein, glycerate kinase (EC 2.7.1.31), glycerol kinase (EC  
308 2.7.1.30), glycerol-3-phosphate dehydrogenase [NAD(P)<sup>+</sup>] (EC 1.1.1.94), octaprenyl diphosphate  
309 synthase (EC 2.5.1.90) / gimethylallyltransferase (EC 2.5.1.1) / (2E,6E)-farnesyl diphosphate  
310 synthase (EC 2.5.1.10) / geranylgeranyl pyrophosphate synthetase (EC 2.5.1.29),  
311 phosphate:acyl-ACP acyltransferase PlsX, phosphatidate cytidyltransferase (EC 2.7.7.41) and  
312 phosphatidylglycerophosphatase B (EC 3.1.3.27) (2 copies). 13 genes/proteins are associated with  
313 biosynthesis of polyamines, including 5'-methylthioadenosine nucleosidase (EC 3.2.2.16) @  
314 S-adenosylhomocysteine nucleosidase (EC 3.2.2.9), ABC transporter, periplasmic spermidine  
315 putrescine-binding protein PotD (TC 3.A.1.11.1), agmatinase (EC 3.5.3.11), arginine  
316 decarboxylase (EC 4.1.1.19), arginine/ornithine antiporter ArcD (3 copies), carboxynorspermidine  
317 decarboxylase, putative (EC 4.1.1.-), carboxynorspermidine dehydrogenase, putative (EC 1.1.1.-),  
318 putrescine transport ATP-binding protein PotA (TC 3.A.1.11.1), spermidine putrescine ABC

319 transporter permease component PotB (TC 3.A.1.11.1), spermidine putrescine ABC transporter  
320 permease component potC (TC..3.A.1.11.1) and spermidine synthase (EC 2.5.1.16). 2  
321 genes/proteins are associated with biosynthesis of teichoic and lipoteichoic acids, including cell  
322 wall teichoic acid glycosylation protein gtcA and teichoic acid export ATP-binding protein TagH  
323 (EC 3.6.3.40). 16 genes/proteins are associated with biosynthesis of quinones, including  
324 2-heptaprenyl-1,4-naphthoquinone methyltransferase (EC 2.1.1.163), electron transport complex  
325 protein RnfA (2 copies), electron transport complex protein RnfB, electron transport complex  
326 protein RnfC, electron transport complex protein RnfD (2 copies), electron transport complex  
327 protein RnfE (2 copies), electron transport complex protein RnfG, heptaprenyl diphosphate  
328 synthase component I (EC 2.5.1.30), microsomal dipeptidase (EC 3.4.13.19), octaprenyl  
329 diphosphate synthase (EC 2.5.1.90) / dimethylallyltransferase (EC 2.5.1.1) / (2E,6E)-farnesyl  
330 diphosphate synthase (EC 2.5.1.10) / geranylgeranyl pyrophosphate synthetase (EC 2.5.1.29)  
331 ubiquinone/menaquinone biosynthesis methyltransferase UbiE (EC 2.1.1.-) @  
332 2-heptaprenyl-1,4-naphthoquinone methyltransferase MenG (EC 2.1.1.163) (2 copies) and  
333 undecaprenyl diphosphate synthase (EC 2.5.1.31). There are no genes responsible for biosynthesis  
334 of lipopolysaccharides or mycolic acids. Additional annotations showed that the CM04-06<sup>T</sup>  
335 genome contains a complete butyrate synthesis pathway, three phage remnants, two intact  
336 prophages, and aminoglycoside antibiotic genes.

337 The type strain, CM04-06<sup>T</sup> (=CGMCC 1.5208<sup>T</sup> = DSM 103432<sup>T</sup>), was isolated from human  
338 gut. The G+C content of the genomic DNA is 57.51 mol% as calculated from whole genome  
339 sequencing.

340

## 341 **Materials and Methods**

### 342 **Origin of bacterial strains**

343 Faeces samples were collected from two healthy donors living in Shenzhen, Guangdong province,  
344 China (GPS positioning of the samples collection site is 37°35'37"N/114°15'32"E) and preserved  
345 refrigerated and anaerobically until processed. The collection of the samples was approved by the  
346 Institutional Review Board on Bioethics and Biosafety of BGI under number BGI-IRB17005-T1.  
347 All protocols were in compliance with the Declaration of Helsinki and explicit informed consent  
348 was obtained from the participants. 1 g of faecal sample was diluted with 0.1 M PBS (pH 7,  
349 supplemented with 0.5% cysteine) and spread onto modified peptone-yeast extract-glucose  
350 (MPYG, supplemented with 5g/L sodium acetate in DSMZ 104 medium) agar plates in an  
351 anaerobic box (Bactron Anaerobic Chamber, Bactron□-2, shellab, USA). The plates were  
352 incubated at 37°C under anaerobic conditions (90% N<sub>2</sub>, 5% CO<sub>2</sub> and 5% H<sub>2</sub>, v/v) for 3 to 5 days.  
353 Single colonies were randomly picked and purified by repetitive subculturing on the new plates  
354 containing the same medium and incubated under the same conditions as described above. Among  
355 the pure cultures, two isolates, designated as AF52-21<sup>T</sup> and CM04-06<sup>T</sup>, respectively, were  
356 obtained and subsequently maintained in 20% (v/v) glycerol and frozen at -80°C.

### 357 **Phenotypic characterization**

358 The morphological characteristics of strains AF52-21<sup>T</sup> and CM04-06<sup>T</sup> were performed on cultures  
359 grown on MPYG medium at 37°C. Bacterial cell shape was examined by phase contrast  
360 microscopy (Olympus BX51, Japan) during the exponential phase of growth. Cell motility was  
361 examined using semi-solid MPYG medium containing 0.5% agar<sup>41</sup>. The Gram reaction was  
362 carried out using a Gram-staining kit (Solarbio, China). Spore formation and presence of flagella

363 were determined by staining using spore stain kit and flagella stain kit supplied by Solarbio (China)  
364 following the manufacturer's instructions. Colony morphology was observed following growth of  
365 the cultures on PYG agar for 2 days at 37°C. Optimal temperature for growth was determined  
366 using growth in MPYG medium at 4, 10, 20, 25, 30, 35, 37, 45 and 50°C for 7 days. The pH range  
367 for growth was also measured in MPYG medium covering the range of pH 3.0–10.0 (at interval of  
368 0.5 pH units) at 37°C for 7 days. Growth at various NaCl concentrations (0-6%, in increments of  
369 1.0%) was performed for determining tolerance to NaCl. Bile tolerance was measured at different  
370 bile salt concentrations (0-5%, at an interval of 1.0%) in the MPYG medium. Catalase activity was  
371 assessed by gas formation after dropping the fresh cells in 3% H<sub>2</sub>O<sub>2</sub> solution. Biochemical  
372 properties, including utilization of substrates, acid production from carbohydrates, enzyme  
373 activities, hydrolytic activities, were determined using the API 20A, API 50CHL and API ZYM  
374 systems ((bioMérieux Inc., Marcy-l'Étoile, France) according to the manufacturer's instructions  
375 with modification by adding sodium acetate at concentration of 0.5% in all tests. The reference  
376 type strain was tested under the same condition with strains AF52-21<sup>T</sup> and CM04-06<sup>T</sup>.

### 377 **Chemotaxonomic characteristics**

378 Chemotaxonomic features were investigated by analyses of cellular fatty acids. Biomasses of  
379 strains AF52-21<sup>T</sup> and CM04-06<sup>T</sup> were harvested from cells growing in MPYG at 37°C for 2 days.  
380 Whole cell fatty acid methyl esters (FAMEs) were extracted, separated and identified according to  
381 the MIDI Microbial Identifications System and performed by CGMGG (China General  
382 Microbiological Culture Collection Center, Beijing, China) identification service.

### 383 **Fermentation products analysis**

384 For analysis the metabolic end products from glucose fermentation, including SCFAs and organic

385 acids, cells were cultured in MPYG broth at 37°C for 2 days. Supernatant harvested from the  
386 cultures centrifuged at 10000g for 10min was used for determining SCFAs and organic acids.  
387 SCFAs detection was performed using a gas chromatograph (GC-7890B, Agilent) equipped with a  
388 flame ionization detector (FID) and capillary column packed with Agilent  
389 19091N-133HP-INNOWax porapak HP-INNOWax (30m × 0.25mm × 0.25um). Organic acids  
390 were analysed by equipping capillary column packed with Agilent 122-5532G DB-5ms (40m ×  
391 0.25mm × 0.25um).

### 392 **PCR of bacterial 16S rRNA genes and phylogenetic analysis**

393 Total genomic DNA of strains AF52-21<sup>T</sup> and CM04-06<sup>T</sup> were extracted using the standard  
394 phenol:chloroform method as described by Cheng and Jiang<sup>42</sup>. The complete 16S rRNA genes  
395 were amplified and sequenced according to the method previously described<sup>43</sup>. Primers used for  
396 amplification of 16S rRNA genes were 27f (5'-AGAGTTTGATCATGGCTCAG-3') and 1492r  
397 (5'-TAGGGTTACCTTGTTACGACTT-3'). The obtained 16S rRNA gene sequences of strains  
398 AF52-21<sup>T</sup> and CM04-06<sup>T</sup> were compared with the sequences of type strains retrieved from the  
399 EzBioCloud database (<https://www.ezbiocloud.net/>)<sup>44</sup> using the BLAST program to determine the  
400 nearest phylogenetic neighbours and 16S rRNA gene sequence similarity values. Phylogenetic  
401 trees were reconstructed by using the neighbour-joining method<sup>45</sup>, maximum-likelihood method<sup>46</sup>  
402 and minimum-evolution method<sup>47</sup> with the MEGA X program package<sup>48</sup>, after Clustal W multiple  
403 alignment of the sequences. Robustness of the phylogenetic trees was evaluated by using the  
404 bootstrap resampling method (1000 resamplings) of Felsenstein<sup>49</sup>.

### 405 **Genome sequencing , assembly, and annotation of isolates**

406 For genome sequences of strains AF52-21<sup>T</sup> and CM04-06<sup>T</sup>, genome DNA was prepared following

407 the method described above. The draft genome was sequenced on an Ion Proton Technology (Life  
408 Technologies) platform at BGI-Shenzhen (Shenzhen, China) after constructing a paired-end DNA  
409 library with insert size of 500 bp. The resulting reads were assembled using the SOAPdenovo 2  
410 package<sup>50</sup>. CheckM (v1.1.2) was used to estimate genome completeness and contamination<sup>51</sup>.  
411 Genome assemblies were visualized using CGView Server<sup>52</sup>  
412 ([http://stothard.afns.ualberta.ca/cgview\\_server/index.html](http://stothard.afns.ualberta.ca/cgview_server/index.html)). Annotation of the assembled genome  
413 was performed using the Rapid Annotation Using Subsystem Technology (RAST) server<sup>53</sup> and  
414 COG database<sup>54</sup>. The G+C content in genomic DNA was calculated from the whole genome  
415 sequence. The genes in known pathways from acetyl-CoA to butyrate were annotated by BLAST  
416 (evalue=1e-5, identity≥60%, coverage≥90%)<sup>33</sup>. A search for prophages was performed by PHAST  
417 (<http://phast.wishartlab.com/>)<sup>55</sup>. Antibiotic resistance was analysed using the CARD database<sup>56</sup>.

## 418 **Average nucleotide identities**

419 Genome relatedness was investigated by calculating average nucleotide identity (ANI)<sup>57</sup>, with a  
420 value of 95-96% proposed for delineating bacterial species, corresponding to the traditional 70%  
421 DNA–DNA reassociation standard<sup>58,59</sup>. The ANI values between strains AF52-21<sup>T</sup>, CM04-06<sup>T</sup>,  
422 and closely related species were determined using the FastANI<sup>60</sup>.

423

## 424 **References**

- 425 1 Russell, S. L. *et al.* Early life antibiotic-driven changes in microbiota enhance susceptibility to  
426 allergic asthma. *EMBO Rep* **13**, 440-447, doi:10.1038/embor.2012.32 (2012).
- 427 2 Costello, E. K. *et al.* Bacterial community variation in human body habitats across space and  
428 time. *Science* **326**, 1694-1697, doi:10.1126/science.1177486 (2009).
- 429 3 Robles Alonso, V. & Guarner, F. Linking the gut microbiota to human health. *Br J Nutr* **109**  
430 **Suppl 2**, S21-26, doi:10.1017/S0007114512005235 (2013).
- 431 4 Tagliabue, A. & Elli, M. The role of gut microbiota in human obesity: recent findings and  
432 future perspectives. *Nutr Metab Cardiovasc Dis* **23**, 160-168,

- 433 doi:10.1016/j.numecd.2012.09.002 (2013).
- 434 5 Ringel-Kulka, T. *et al.* Intestinal microbiota in healthy U.S. young children and adults--a high  
435 throughput microarray analysis. *PLoS One* **8**, e64315, doi:10.1371/journal.pone.0064315  
436 (2013).
- 437 6 Voreades, N., Kozil, A. & Weir, T. L. Diet and the development of the human intestinal  
438 microbiome. *Front Microbiol* **5**, 494, doi:10.3389/fmicb.2014.00494 (2014).
- 439 7 Benson, A. K. *et al.* Individuality in gut microbiota composition is a complex polygenic trait  
440 shaped by multiple environmental and host genetic factors. *Proc Natl Acad Sci U S A* **107**,  
441 18933-18938, doi:10.1073/pnas.1007028107 (2010).
- 442 8 Claesson, M. J. *et al.* Gut microbiota composition correlates with diet and health in the elderly.  
443 *Nature* **488**, 178-184, doi:10.1038/nature11319 (2012).
- 444 9 De Filippo, C. *et al.* Impact of diet in shaping gut microbiota revealed by a comparative study  
445 in children from Europe and rural Africa. *Proc Natl Acad Sci U S A* **107**, 14691-14696,  
446 doi:10.1073/pnas.1005963107 (2010).
- 447 10 Antunes, L. C. & Finlay, B. B. A comparative analysis of the effect of antibiotic treatment and  
448 enteric infection on intestinal homeostasis. *Gut Microbes* **2**, 105-108 (2011).
- 449 11 Wilson, I. D. & Nicholson, J. K. The role of gut microbiota in drug response. *Curr Pharm Des*  
450 **15**, 1519-1523 (2009).
- 451 12 Adlerberth, I. Factors influencing the establishment of the intestinal microbiota in infancy.  
452 *Nestle Nutr Workshop Ser Pediatr Program* **62**, 13-29; discussion 29-33,  
453 doi:10.1159/000146245 (2008).
- 454 13 DiBaise, J. K. *et al.* Gut microbiota and its possible relationship with obesity. *Mayo Clin Proc*  
455 **83**, 460-469, doi:10.4065/83.4.460 (2008).
- 456 14 Ley, R. E., Turnbaugh, P. J., Klein, S. & Gordon, J. I. Microbial ecology: human gut microbes  
457 associated with obesity. *Nature* **444**, 1022-1023, doi:10.1038/4441022a (2006).
- 458 15 Parekh, P. J., Arusi, E., Vinik, A. I. & Johnson, D. A. The role and influence of gut microbiota  
459 in pathogenesis and management of obesity and metabolic syndrome. *Front Endocrinol*  
460 *(Lausanne)* **5**, 47, doi:10.3389/fendo.2014.00047 (2014).
- 461 16 Larsen, N. *et al.* Gut microbiota in human adults with type 2 diabetes differs from  
462 non-diabetic adults. *PLoS One* **5**, e9085, doi:10.1371/journal.pone.0009085 (2010).
- 463 17 Qin, J. *et al.* A metagenome-wide association study of gut microbiota in type 2 diabetes.  
464 *Nature* **490**, 55-60, doi:10.1038/nature11450 (2012).
- 465 18 Conte, M. P. *et al.* Gut-associated bacterial microbiota in paediatric patients with  
466 inflammatory bowel disease. *Gut* **55**, 1760-1767, doi:10.1136/gut.2005.078824 (2006).
- 467 19 Joossens, M. *et al.* Dysbiosis of the faecal microbiota in patients with Crohn's disease and  
468 their unaffected relatives. *Gut* **60**, 631-637, doi:10.1136/gut.2010.223263 (2011).
- 469 20 Feng, Q. *et al.* Gut microbiome development along the colorectal adenoma-carcinoma  
470 sequence. *Nat Commun* **6**, 6528, doi:10.1038/ncomms7528 (2015).
- 471 21 Louis, P., Hold, G. L. & Flint, H. J. The gut microbiota, bacterial metabolites and colorectal  
472 cancer. *Nat Rev Microbiol* **12**, 661-672, doi:10.1038/nrmicro3344 (2014).
- 473 22 Aron-Wisniewsky, J., Gaborit, B., Dutour, A. & Clement, K. Gut microbiota and non-alcoholic  
474 fatty liver disease: new insights. *Clin Microbiol Infect* **19**, 338-348,  
475 doi:10.1111/1469-0691.12140 (2013).
- 476 23 Gkolfakis, P., Dimitriadis, G. & Triantafyllou, K. Gut microbiota and non-alcoholic fatty liver

- 477 disease. *Hepatobiliary Pancreat Dis Int* **14**, 572-581 (2015).
- 478 24 Ríos-Covián, D. *et al.* Intestinal Short Chain Fatty Acids and their Link with Diet and Human  
479 Health. *Frontiers in Microbiology* **7**, doi:10.3389/fmicb.2016.00185 (2016).
- 480 25 Puertollano, E., Kolida, S. & Yaqoob, P. Biological significance of short-chain fatty acid  
481 metabolism by the intestinal microbiome. *Curr Opin Clin Nutr Metab Care* **17**, 139-144,  
482 doi:10.1097/MCO.000000000000025 (2014).
- 483 26 Quevrain, E. *et al.* Identification of an anti-inflammatory protein from *Faecalibacterium*  
484 *prausnitzii*, a commensal bacterium deficient in Crohn's disease. *Gut* **65**, 415-425,  
485 doi:10.1136/gutjnl-2014-307649 (2016).
- 486 27 Sokol, H. *et al.* *Faecalibacterium prausnitzii* is an anti-inflammatory commensal bacterium  
487 identified by gut microbiota analysis of Crohn disease patients. *Proc Natl Acad Sci U S A* **105**,  
488 16731-16736, doi:10.1073/pnas.0804812105 (2008).
- 489 28 Duncan, S. H., Hold, G. L., Harmsen, H. J., Stewart, C. S. & Flint, H. J. Growth requirements  
490 and fermentation products of *Fusobacterium prausnitzii*, and a proposal to reclassify it as  
491 *Faecalibacterium prausnitzii* gen. nov., comb. nov. *Int J Syst Evol Microbiol* **52**, 2141-2146,  
492 doi:10.1099/00207713-52-6-2141 (2002).
- 493 29 Fitzgerald, C. B. *et al.* Comparative analysis of *Faecalibacterium prausnitzii* genomes shows a  
494 high level of genome plasticity and warrants separation into new species-level taxa. *BMC*  
495 *Genomics* **19**, 931, doi:10.1186/s12864-018-5313-6 (2018).
- 496 30 Chang Liu, M.-X. D., Rexiding Abuduaini, Hai-Ying Yu, Dan-Hua Li, Yu-Jing Wang, Nan  
497 Zhou, Min-Zhi Jiang, Peng-Xia Niu, Shan-Shan Han, Hong-He Chen, Wen-Yu Shi, Linhuan  
498 Wu, Yu-Hua Xin, Juncai Ma, Yuguang Zhou, Cheng-Ying Jiang, Hong-Wei Liu, Shuang-Jiang  
499 Liu. Enlightening the Taxonomy Darkness of Human Gut Microbiomes With Cultured  
500 Biobank. *Research Square*, doi:10.21203/rs.3.rs-74101/v1 (2020).
- 501 31 Miquel, S. *et al.* *Faecalibacterium prausnitzii* and human intestinal health. *Curr Opin*  
502 *Microbiol* **16**, 255-261, doi:10.1016/j.mib.2013.06.003 (2013).
- 503 32 Rossi-Tamisier, M., Fournier, P.-E., Benamar, S. & Raoult, D. Cautionary tale of using 16S  
504 rRNA gene sequence similarity values in identification of human-associated bacterial species.  
505 *International Journal of Systematic and Evolutionary Microbiology* **65**, 1929-1934,  
506 doi:10.1099/ijs.0.000161 (2015).
- 507 33 Vital, M., Howe, A. C. & Tiedje, J. M. Revealing the bacterial butyrate synthesis pathways by  
508 analyzing (meta)genomic data. *mBio* **5**, e00889, doi:10.1128/mBio.00889-14 (2014).
- 509 34 Zou, Y. *et al.* 1,520 reference genomes from cultivated human gut bacteria enable functional  
510 microbiome analyses. *Nat Biotechnol* **37**, 179-185, doi:10.1038/s41587-018-0008-8 (2019).
- 511 35 Zhou, L. *et al.* *Faecalibacterium prausnitzii* Produces Butyrate to Maintain Th17/Treg Balance  
512 and to Ameliorate Colorectal Colitis by Inhibiting Histone Deacetylase 1. *Inflamm Bowel Dis*  
513 **24**, 1926-1940, doi:10.1093/ibd/izy182 (2018).
- 514 36 Fujimoto, T. *et al.* Decreased abundance of *Faecalibacterium prausnitzii* in the gut microbiota  
515 of Crohn's disease. *J Gastroenterol Hepatol* **28**, 613-619, doi:10.1111/jgh.12073 (2013).
- 516 37 Machiels, K. *et al.* A decrease of the butyrate-producing species *Roseburia hominis* and  
517 *Faecalibacterium prausnitzii* defines dysbiosis in patients with ulcerative colitis. *Gut* **63**,  
518 1275-1283, doi:10.1136/gutjnl-2013-304833 (2014).
- 519 38 Lopez-Siles, M. *et al.* Alterations in the Abundance and Co-occurrence of *Akkermansia*  
520 *muciniphila* and *Faecalibacterium prausnitzii* in the Colonic Mucosa of Inflammatory Bowel



- 521 Disease Subjects. *Front Cell Infect Microbiol* **8**, 281, doi:10.3389/fcimb.2018.00281 (2018).
- 522 39 Chang, C. J. *et al.* Next generation probiotics in disease amelioration. *J Food Drug Anal* **27**,  
523 615-622, doi:10.1016/j.jfda.2018.12.011 (2019).
- 524 40 De Filippis, F., Pasolli, E. & Ercolini, D. Newly Explored Faecalibacterium Diversity Is  
525 Connected to Age, Lifestyle, Geography, and Disease. *Curr Biol*,  
526 doi:10.1016/j.cub.2020.09.063 (2020).
- 527 41 Tittsler, R. P. & Sandholzer, L. A. The Use of Semi-solid Agar for the Detection of Bacterial  
528 Motility. *J Bacteriol* **31**, 575-580 (1936).
- 529 42 Cheng, H. R. & Jiang, N. Extremely rapid extraction of DNA from bacteria and yeasts.  
530 *Biotechnol Lett* **28**, 55-59, doi:10.1007/s10529-005-4688-z (2006).
- 531 43 Zou, Y. *et al.* *Lactobacillus shenzhenensis* sp. nov., isolated from a fermented dairy beverage.  
532 *Int J Syst Evol Microbiol* **63**, 1817-1823, doi:10.1099/ijs.0.041111-0 (2013).
- 533 44 Yoon, S. H. *et al.* Introducing EzBioCloud: a taxonomically united database of 16S rRNA  
534 gene sequences and whole-genome assemblies. *Int J Syst Evol Microbiol* **67**, 1613-1617,  
535 doi:10.1099/ijsem.0.001755 (2017).
- 536 45 Saitou, N. & Nei, M. The neighbor-joining method: a new method for reconstructing  
537 phylogenetic trees. *Mol Biol Evol* **4**, 406-425 (1987).
- 538 46 Felsenstein, J. Evolutionary trees from DNA sequences: a maximum likelihood approach. *J*  
539 *Mol Evol* **17**, 368-376 (1981).
- 540 47 Rzhetsky, A. & Nei, M. Theoretical foundation of the minimum-evolution method of  
541 phylogenetic inference. *Mol Biol Evol* **10**, 1073-1095 (1993).
- 542 48 Kumar, S., Stecher, G., Li, M., Knyaz, C. & Tamura, K. MEGA X: Molecular Evolutionary  
543 Genetics Analysis across Computing Platforms. *Mol Biol Evol* **35**, 1547-1549,  
544 doi:10.1093/molbev/msy096 (2018).
- 545 49 Felsenstein, J. Confidence limits on phylogenies: an approach using the bootstrap. *Evolution*  
546 **39**, 783-791, doi:10.2307/2408678 (1985).
- 547 50 Luo, R. *et al.* SOAPdenovo2: an empirically improved memory-efficient short-read de novo  
548 assembler. *Gigascience* **1**, 18, doi:10.1186/2047-217X-1-18 (2012).
- 549 51 Parks, D. H., Imelfort, M., Skennerton, C. T., Hugenholtz, P. & Tyson, G. W. CheckM:  
550 assessing the quality of microbial genomes recovered from isolates, single cells, and  
551 metagenomes. *Genome Res* **25**, 1043-1055, doi:10.1101/gr.186072.114 (2015).
- 552 52 Grant, J. R. & Stothard, P. The CGView Server: a comparative genomics tool for circular  
553 genomes. *Nucleic Acids Res* **36**, W181-184, doi:10.1093/nar/gkn179 (2008).
- 554 53 Aziz, R. K. *et al.* The RAST Server: rapid annotations using subsystems technology. *BMC*  
555 *Genomics* **9**, 75, doi:10.1186/1471-2164-9-75 (2008).
- 556 54 Galperin, M. Y., Makarova, K. S., Wolf, Y. I. & Koonin, E. V. Expanded microbial genome  
557 coverage and improved protein family annotation in the COG database. *Nucleic Acids Res* **43**,  
558 D261-269, doi:10.1093/nar/gku1223 (2015).
- 559 55 Zhou, Y., Liang, Y., Lynch, K. H., Dennis, J. J. & Wishart, D. S. PHAST: a fast phage search  
560 tool. *Nucleic Acids Res* **39**, W347-352, doi:10.1093/nar/gkr485 (2011).
- 561 56 Jia, B. *et al.* CARD 2017: expansion and model-centric curation of the comprehensive  
562 antibiotic resistance database. *Nucleic Acids Res* **45**, D566-D573, doi:10.1093/nar/gkw1004  
563 (2017).
- 564 57 Richter, M. & Rossello-Mora, R. Shifting the genomic gold standard for the prokaryotic

- 565 species definition. *Proc Natl Acad Sci U S A* **106**, 19126-19131,  
566 doi:10.1073/pnas.0906412106 (2009).
- 567 58 Goris, J. *et al.* DNA-DNA hybridization values and their relationship to whole-genome  
568 sequence similarities. *Int J Syst Evol Microbiol* **57**, 81-91, doi:10.1099/ijs.0.64483-0 (2007).
- 569 59 Kim, M., Oh, H. S., Park, S. C. & Chun, J. Towards a taxonomic coherence between average  
570 nucleotide identity and 16S rRNA gene sequence similarity for species demarcation of  
571 prokaryotes. *Int J Syst Evol Microbiol* **64**, 346-351, doi:10.1099/ijs.0.059774-0 (2014).
- 572 60 Jain, C., Rodriguez, R. L., Phillippy, A. M., Konstantinidis, K. T. & Aluru, S. High throughput  
573 ANI analysis of 90K prokaryotic genomes reveals clear species boundaries. *Nat Commun* **9**,  
574 5114, doi:10.1038/s41467-018-07641-9 (2018).
- 575 61 Guo, X. *et al.* CNSA: a data repository for archiving omics data. *Database (Oxford)* **2020**,  
576 doi:10.1093/database/baaa055 (2020).
- 577 62 Chen, F. Z. *et al.* CNGBdb: China National GeneBank DataBase. *Yi Chuan* **42**, 799-809,  
578 doi:10.16288/j.ycz.20-080 (2020).

579

## 580 **Acknowledgment**

581 This work was supported by grants from National Key Research and Development Program of  
582 China (No. 2018YFC1313801) and Natural Science Foundation of Guangdong Province, China  
583 (No. 2019B020230001). We also thank the colleagues at BGI-Shenzhen for sample collection, and  
584 discussions, and China National Genebank (CNGB) Shenzhen for DNA extraction, library  
585 construction, and sequencing.

## 586 **Author contributions**

587 Conceived and designed the experiments: Y.Z. and L.X. Performed the experiments: Y.Z., W.X.,  
588 and Y.D. Analyzed the data: Y.Z., L.X., and X.L. Contributed reagents/materials/analysis tools:  
589 Y.Z., W.X. and Y.D. Wrote the paper: Y.Z. and X.L. Revised the paper: K.K.

590

## 591 **Data Availability Statement**

592 The GenBank/EMBL/DDBJ accession numbers for the 16S rRNA gene sequences determined in  
593 this study are: AF52-21<sup>T</sup> (KX146426) and CM04-06<sup>T</sup> (KX150462). The data of draft genome

594 sequences have been deposited into CNGB Sequence Archive (CNSA) <sup>61</sup> of China National

595 GeneBank DataBase (CNGBdb) <sup>62</sup> with accession number CNA0017730 and CNA0017731 for

596 strains AF52-21<sup>T</sup> and CM04-06<sup>T</sup>, respectively.

597

## 598 **Figure Legends**

599 **Figure 1. Micrographs of strains AF52-21<sup>T</sup>, CM04-06<sup>T</sup> after Gram staining.**

600 A, AF52-21<sup>T</sup>; B, CM04-06<sup>T</sup>.

601

602 **Figure 2. Neighbour-joining phylogenetic tree based on 16S rRNA gene sequences showing**  
603 **the phylogenetic relationships of strains AF52-21<sup>T</sup>, CM04-06<sup>T</sup> and the representatives of**  
604 **several other related taxa within the family *Ruminococcaceae*.**

605 *Clostridium butyricum* DSM 10702<sup>T</sup> (AQQF01000149) was used as an out-group. Bootstrap  
606 values based on 1000 replications higher than 70% are shown at the branching points. Bar,  
607 substitutions per nucleotide position.

608

609 **Figure 3. Circular map of AF52-21<sup>T</sup>.**

610 Innermost circle, GC skew; circle 2, G+C content; circle 3, contigs; circles 4, predicted prophage  
611 remnants; circle 5, tmRNA, tRNA and rRNA genes; circles 6, CDS; circles 7-9, homologous  
612 genomic segments from CM04-06<sup>T</sup>, *F. prausnitzii* ATCC 27768<sup>T</sup> and *F. hominis* 4P-15<sup>T</sup>.

613

614 **Figure 4. Circular map of CM04-06<sup>T</sup>.**

615 Innermost circle, GC skew; circle 2, G+C content; circle 3, contigs; circles 4, predicted prophage  
616 remnants; circle 5, tmRNA, tRNA and rRNA genes; circles 6, CDS; circles 7-9, homologous  
617 genomic segments from AF52-21<sup>T</sup>, *F. prausnitzii* ATCC 27768<sup>T</sup> and *F. hominis* 4P-15<sup>T</sup>.

618

619 **Figure 5. Comparison of COG functional categories of strains AF52-21<sup>T</sup>, CM04-06<sup>T</sup> and the**

620 **closest related species *F. prausnitzii* ATCC 27768<sup>T</sup>.**

621

622 **Figure 6. The synthesis pathways from Acetyl-CoA to Butyrate. Strains AF52-21<sup>T</sup>,**

623 **CM04-06<sup>T</sup> and ATCC 27768<sup>T</sup> were annotated as blue, red, and yellow.**

624 Thl, thiolase; Hdb,  $\beta$ -hydroxybutyryl-CoA dehydrogenase; Cro, crotonase; Bcd, butyryl-CoA

625 dehydrogenase; But, butyryl-CoA:acetate CoA transferase; Ptb, phosphate butyryltransferase; Buk,

626 butyrate kinase.

627

628 **Figure 7. Distribution of prophage in strains AF52-21T and CM04-06T.**

629

630 **Figure 8. Comparison of resistance genes in strains AF52-21<sup>T</sup>, CM04-06<sup>T</sup>, and *F.***

631 ***prausnitzii* ATCC 27768<sup>T</sup>.**

632

633

634

635

636

637

638

639

640

641

642 **Figure 1**

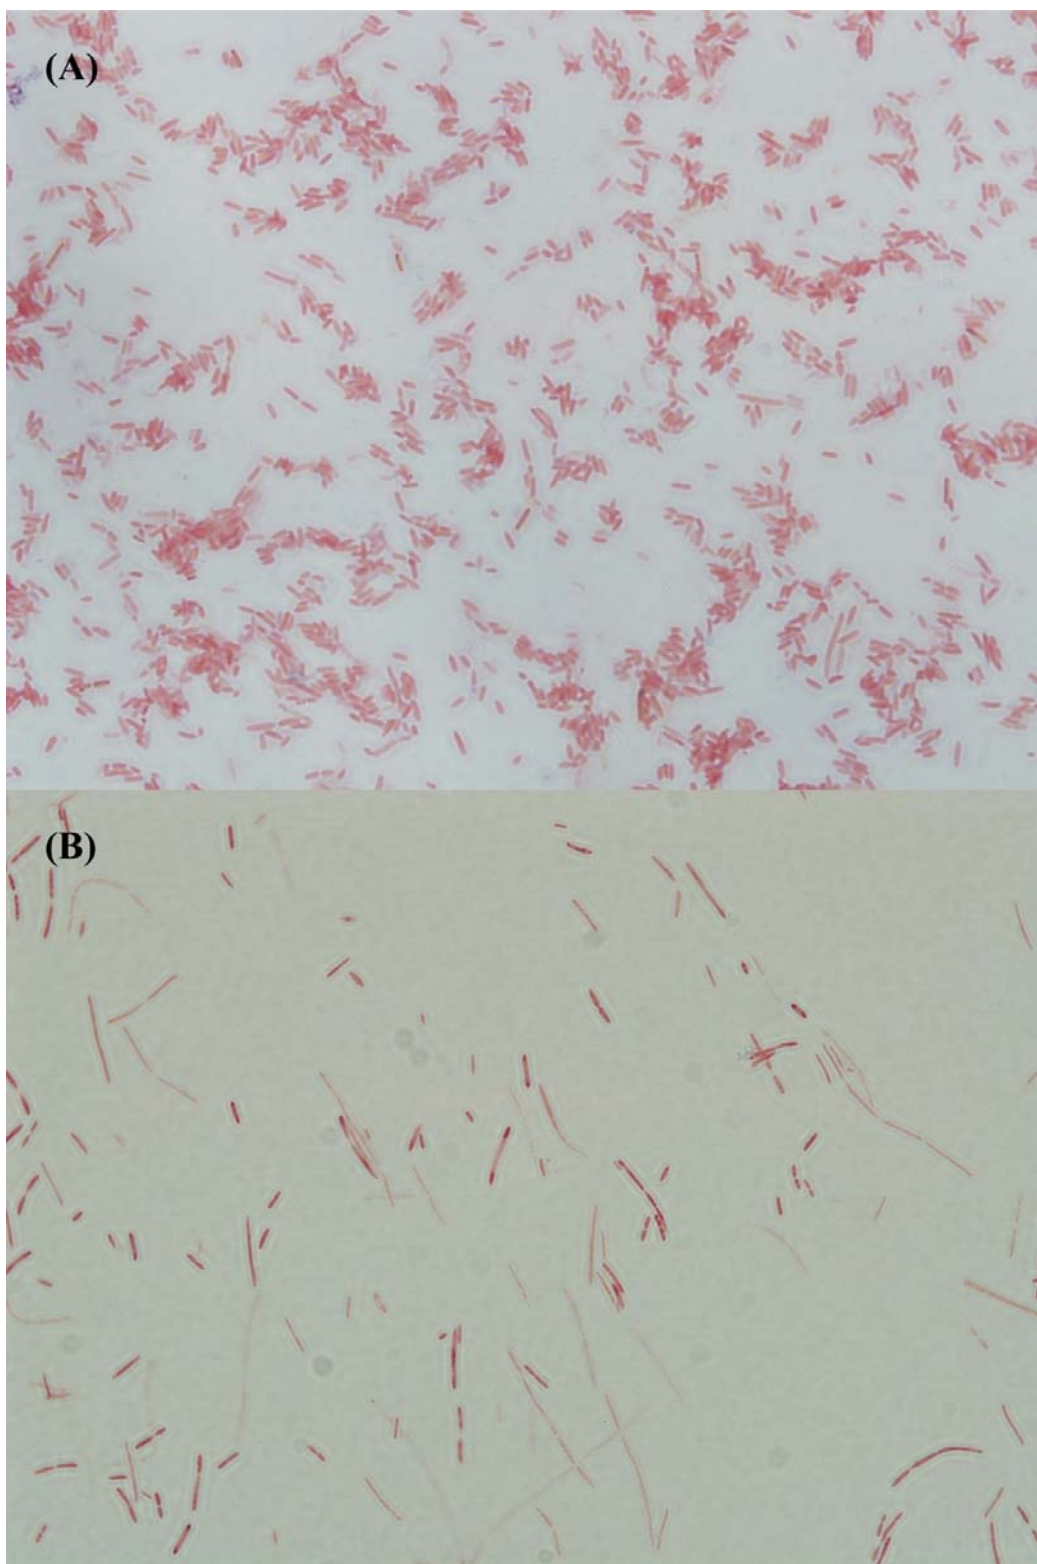

643

644

645 **Figure 2**

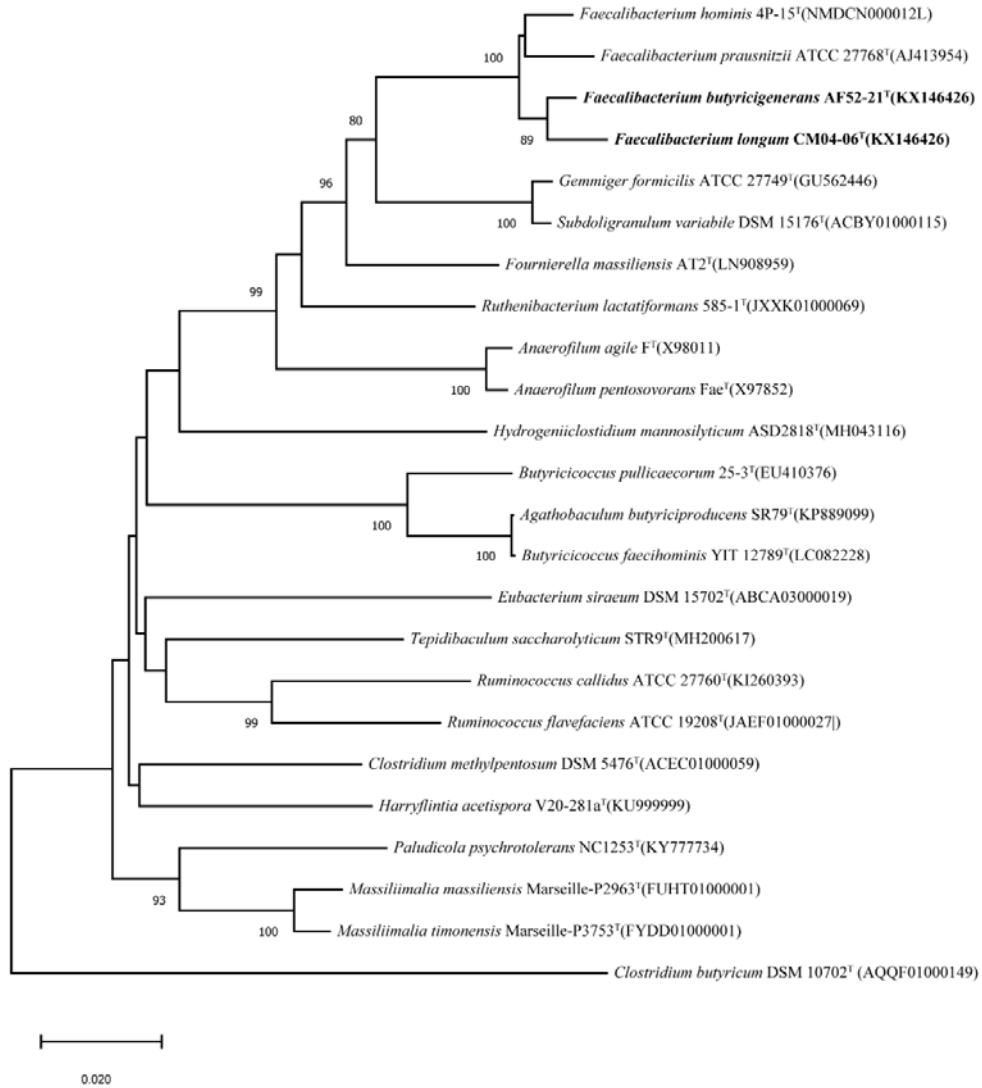

646

647

648 **Figure 3**

Length:2,851,918bp

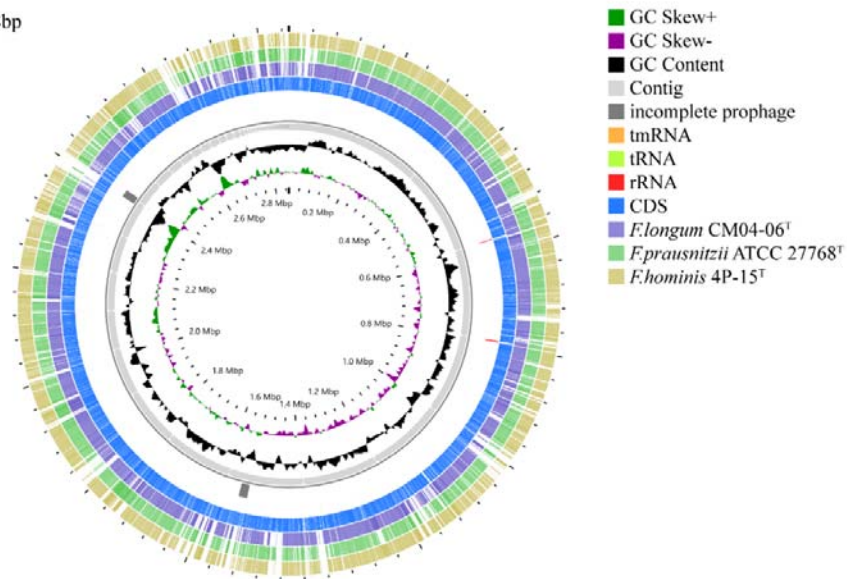

649

650



651 **Figure 4**

Length:3,011,178bp

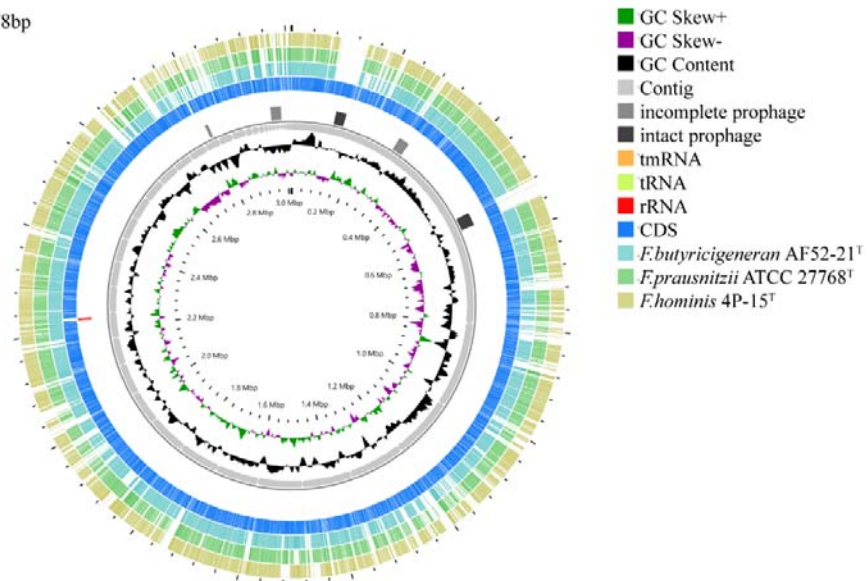

652

653 **Figure 5**

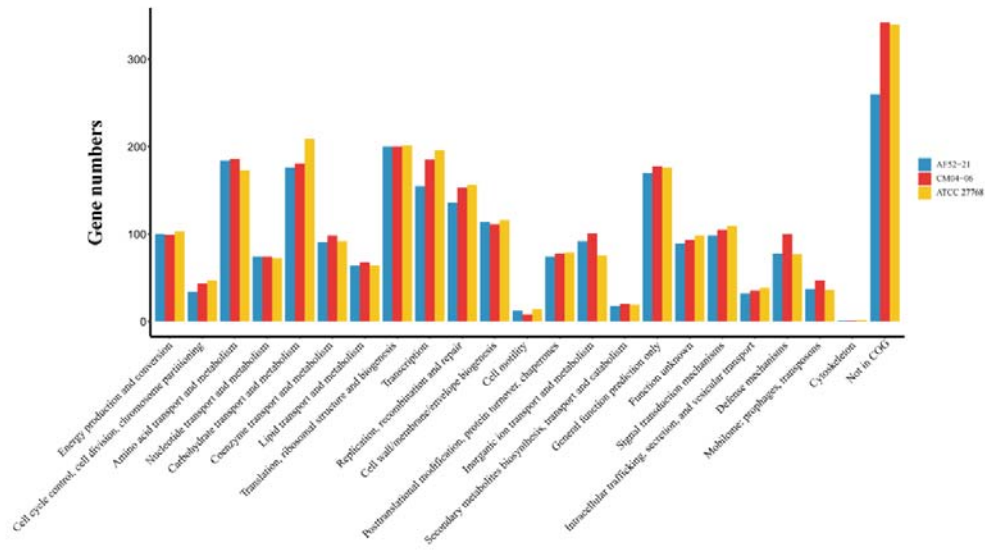

654

655

656 **Figure 6**

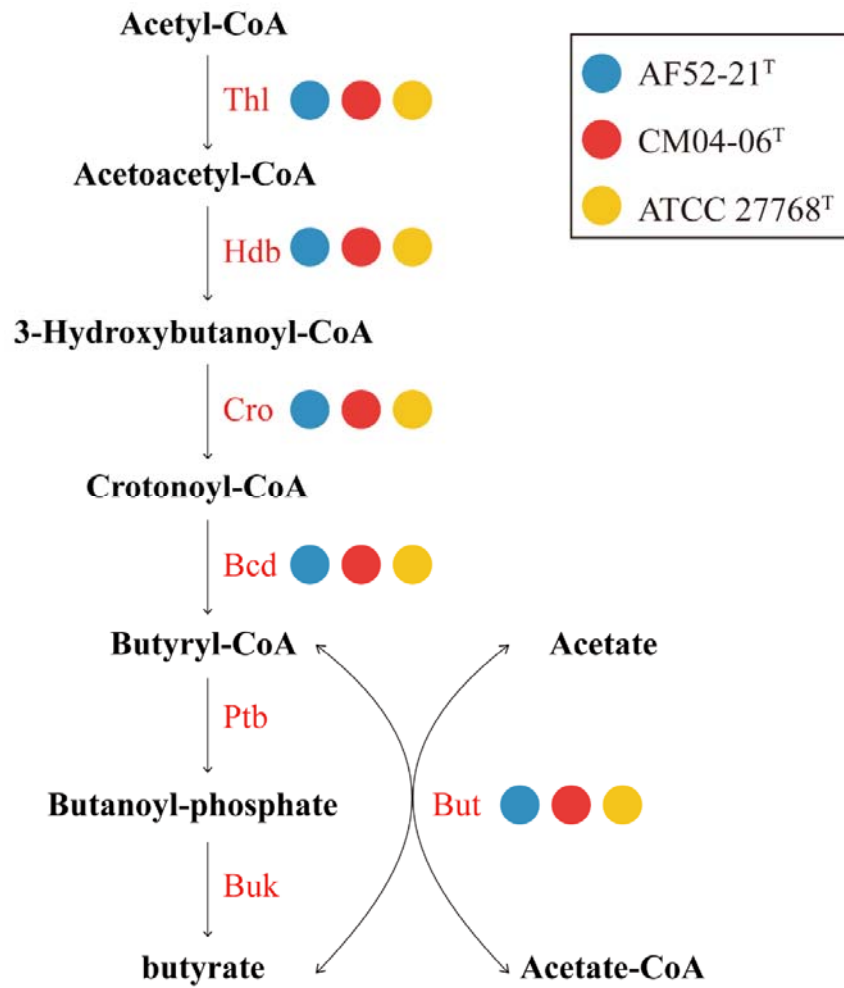

657

658

659 **Figure 7**

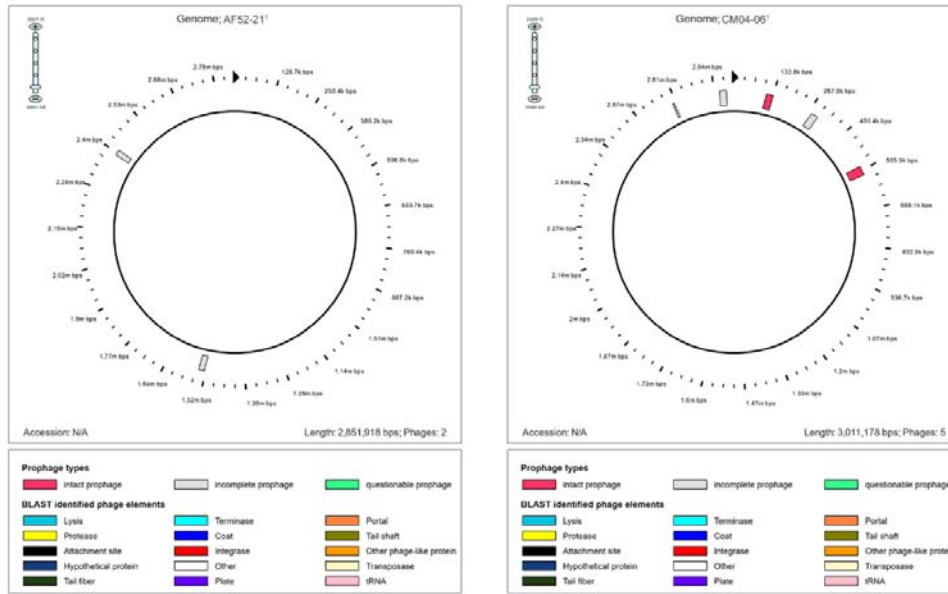

660  
661

662 **Figure 8**

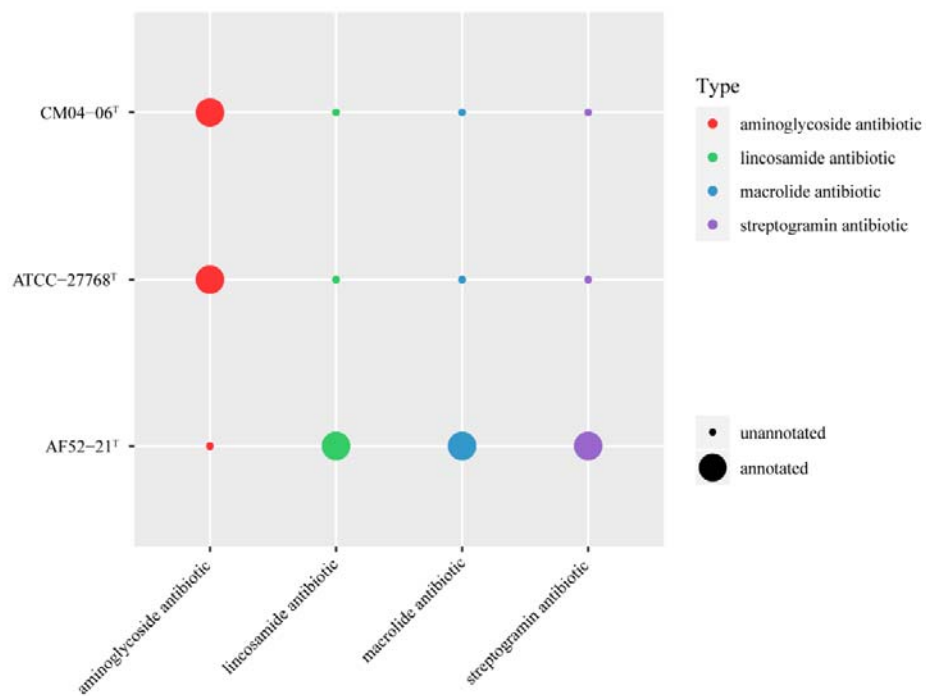

663

664

## 665 **Supplementary Material**

666 **Supplementary Table S1. Number of genes associated with general COG functional**  
667 **categories in the genome of *F. butyricigenans* AF52-21<sup>T</sup> and *F. longum* CM04-06<sup>T</sup>.**

668 **Supplementary Table S2. The specific genes/protein related to biosynthesis of DAP, polar**  
669 **lipids, polyamines and lipoteichoic and teichoic acids and their positions in the genome in**  
670 **comparison of strains AF52-21<sup>T</sup>, CM04-06<sup>T</sup> and related organism, ATCC 27768<sup>T</sup> identified**  
671 **by Rapid Annotation Subsystem Technology (RAST).**

672

673 **Supplementary Figure S1. Maximum-likelihood phylogenetic tree based on 16S rRNA gene**  
674 **sequences showing the phylogenetic relationships of strains AF52-21<sup>T</sup>, CM04-06<sup>T</sup> and the**  
675 **representatives of related taxa. *Clostridium butyricum* DSM 10702<sup>T</sup> (AQQF01000149) was used**  
676 **as an out-group. Bootstrap values based on 1000 replications higher than 70% are shown at the**  
677 **branching points. Bar, substitutions per nucleotide position.**

678

679 **Supplementary Figure S2. Minimum-evolution phylogenetic tree based on 16S rRNA gene**  
680 **sequences showing the phylogenetic relationships of strains AF52-21<sup>T</sup>, CM04-06<sup>T</sup> and the**  
681 **representatives of related taxa. *Clostridium butyricum* DSM 10702<sup>T</sup> (AQQF01000149) was used**  
682 **as an out-group. Bootstrap values based on 1000 replications higher than 70% are shown at the**  
683 **branching points. Bar, substitutions per nucleotide position.**

684

685 **Supplementary Figure S3. Certification. Deposit certification of AF52-21<sup>T</sup> in CGMCC.**

686 **Supplementary Figure S4. Certification. Deposit certification of AF52-21<sup>T</sup> in DSMZ.**

687 **Supplementary Figure S5. Certification. Deposit certification of CM04-06<sup>T</sup> in CGMCC.**

688 **Supplementary Figure S6. Certification. Deposit certification of CM04-06<sup>T</sup> in DSMZ.**
